# Supplementary material
Source: Research Square preprint supplement (doi:10.21203/rs.3.rs-9550127/v1)
Supplement: Supplementary file 1 [file 6cba59fc25cd717eea739190.docx]

Supplementary material

Table S1: Primers used by Canadian Centre for DNA Barcoding on the selected specimens and pre-extracted DNA sent for DNA barcoding.

| **Plate** | **Phyla present in plate** | **Primers used** |
| --- | --- | --- |
| CCDB-48560 | Echinodermata | C_GasF1_t1 + GasR1_t1 |
| CCDB-48562 | Annelida, Arthropoda | C_GasF1_t1 + GasR1_t1 |
| CCDB-48590 | Arthopoda, Cnidaria, Mollusca | C_GasF1_t1 + GasR1_t1 |
| CCDB-48559 | Annelida, Nemertea | C_LepFolF-C_LepFolR |
| CCDB-48589 | Annelida, Mollusca, Porifera | C_LepFolF-C_LepFolR |
| CCDB-48598 | Annelida, Nemertea | LCO1490_t1 - HCO2198_t1 |
| CCDB-48558 | Annelida, Mollusca | LCOech1aF1-HCO2198 |
| CCDB-48561 | Annelida, Chordata, Porifera | polyLCO-polyHCO |
| CCDB-48588 | Annelida | polyLCO-polyHCO |
| CCDB-48591 | DNA pre-extracted: Annelida, Arthropoda, Chordata, Cnidaria, Echinodermata, Mollusca, Nemertea | polyLCO-polyHCO |

Table S2: Statistical analysis of total specimen count against factors using linear model. Significant results indicated in red italics.

| **Factor** | **DF** | **Adjusted R-squared** | **F statistic** | **P value** |
| --- | --- | --- | --- | --- |
| Island | 155 | -0.01395 | 0.2756 | 0.8429 |
| Location | 123 | 0.3508 | 3.439 | *2.409e-07* |
| Water depth (m) | 157 | -0.005276 | 0.1707 | 0.68 |
| Quadrat volume (cm3) | 159 | 0.9951 | 3.272e+4 | *2.2e-16* |
| Rubble type (B, M, mix, shell, shellB, shellM) | 153 | 0.02631 | 1.854 | 0.1057 |
| Rubble patch size (m2) | 157 | 0.1017 | 18.88 | *2.49e-05* |
| Rubble patch size (S, M, L, XL) | 155 | 0.05026 | 3.787 | *0.01173* |
| Percentage rubble branching | 157 | -0.005535 | 0.1302 | 0.7187 |
| Percentage rubble dredged | 157 | -0.000982 | 0.845 | 0.3594 |
| Percentage rubble massive | 157 | -0.006176 | 0.03022 | 0.8622 |
| Percentage rubble other | 157 | 0.02382 | 4.856 | *0.02901* |
| Percentage rubble rock | 157 | 0.02579 | 4.156 | *0.04316* |
| Percentage rubble shell | 157 | 0.01444 | 3.315 | 0.07055 |
| Rubble count | 157 | 0.006138 | 1.976 | 0.1618 |
| Rubble volume (cm3) | 159 | 0.9949 | 3.136e+04 | 2.2e-16 |
| Mean rubble fragment volume (cm3) | 157 | -0.00066 | 0.8958 | 0.345 |
| Mean rubble fragment length (cm) | 157 | 0.01398 | 3.24 | 0.07377 |
| Mean rubble fragment width (cm) | 157 | 0.0101 | 2.612 | 0.1081 |
| Mean branching rubble fragment volume (cm3) | 150 | -0.003086 | 0.5355 | 0.4655 |
| Mean dredged rubble fragment volume (cm3) | 1 | -0.7964 | 0.1134 | 0.7932 |
| Mean massive rubble fragment volume (cm3) | 145 | 0.01246 | 2.843 | 0.09395 |
| Mean other rubble fragment volume (cm3) | 157 | 0.001197 | 1.189 | 0.2771 |
| Mean rock fragment volume (cm3) | 33 | -0.02228 | 0.259 | 0.6142 |
| Mean shell fragment volume (cm3) | 149 | -0.001687 | 0.7474 | 0.3887 |
| Mean branching rubble fragment length (cm) | 150 | 0.006443 | 1.979 | 0.1615 |
| Mean dredged rubble fragment length (cm) | 1 | -0.7913 | 0.1165 | 0.7906 |
| Mean massive rubble fragment length (cm) | 142 | 0.05258 | 8.936 | *0.003296* |
| Mean other rubble fragment length (cm) | 157 | 0.02417 | 4.914 | *0.02807* |
| Mean rock fragment length (cm) | 34 | -0.01681 | 0.4212 | 0.5207 |
| Mean shell fragment length (cm) | 148 | -0.004125 | 0.3879 | 0.5343 |
| Mean branching rubble fragment width (cm) | 150 | 0.01913 | 3.945 | *0.04884* |
| Mean dredged rubble fragment width (cm) | 1 | -0.7428 | 0.1476 | 0.7665 |
| Mean massive rubble fragment width (cm) | 143 | 0.06636 | 11.24 | *0.001027* |
| Mean other rubble fragment width (cm) | 157 | 0.01048 | 2.674 | 0.104 |
| Mean rock fragment width (cm) | 33 | -0.007435 | 0.7491 | 0.393 |
| Mean shell fragment width (cm) | 148 | -0.004919 | 0.2707 | 0.6037 |
| Interstitial space (cm3) | 157 | -0.005346 | 0.1598 | 0.6899 |
| Percentage of available space within rubble matrix (cm3) | 158 | -0.006309 | 0.003213 | 0.955 |
| Adjacent habitat (coral, coralrock, rock, rubble, sand, sandrock, sandrockseagrass, seagrass) | 151 | 0.1263 | 4.262 | *0.0002525* |
| Adjacent distance to coral (m) | 141 | 0.01895 | 3.743 | 0.05503 |
| Adjacent distance to reef (m) | 123 | 0.004328 | 1.539 | 0.2171 |
| Adjacent distance to rock (m) | 150 | 0.02511 | 4.889 | *0.0284* |
| Adjacent distance to sand (m) | 60 | 0.06514 | 5.25 | *0.02547* |
| Adjacent distance to seagrass (m) | 12 | -0.02878 | 0.9627 | 0.3459 |

Table S3: Statistical analysis of separate phyla presence/absence against factors using logistical regression. Significant results indicated in red italics.

| Factor | | Annelida | | Arthropoda | | Chordata | | Cnidaria | | Echinodermata | | Mollusca | | Nemertea | | Other | | Porifera | |
| --- | --- | --- | --- | --- | --- | --- | --- | --- | --- | --- | --- | --- | --- | --- | --- | --- | --- | --- | --- |
| Z value | p value | Z value | p value | Z value | p value | Z value | p value | Z value | p value | Z value | p value | Z value | p value | Z value | p value | Z value | p value |
| Island | East Caicos | 0.813 | 0.416 | 1.2 | 0.23 | -3.15 | 0.002 | -0.006 | 1 | 0.81 | 0.42 | 2.66 | *0.008* | -3.25 | *0.001* | -3.15 | *0.002* | -1.21 | 0.23 |
| Grand Turk | -1.434 | 0.152 | 0 | 1 | 0.77 | 0.44 | 0 | 1 | -1.43 | 0.15 | -2.06 | *0.04* | 0.47 | 0.64 | -0.47 | 0.64 | -2.22 | 0.027 |
| Providenciales | -1.126 | 0.26 | -0.62 | 0.54 | 0.44 | 0.66 | 0.005 | 1 | -1.13 | 0.26 | -1.59 | 0.11 | -1.44 | 0.15 | 1.85 | 0.06 | -0.48 | 0.63 |
| South Caicos | 1.449 | 0.147 | 1.25 | 0.2 | 0.34 | 0.73 | 0 | 1 | 1.45 | 0.15 | -0.81 | 0.42 | 0 | 1 | 1.44 | 0.15 | -1.68 | 0.09 |
| Location | Barracuda Bay | 0 | 1 | 0.005 | 1 | -0.003 | 1 | -0.001 | 1 | -0.005 | 1 | 0.008 | 0.99 | -0.001 | 1 | 0.57 | 0.57 | 0.57 | 0.57 |
| Black Jack Valley | 0 | 1 | 0 | 1 | 0.003 | 1 | 0 | 1 | 0.005 | 1 | -0.007 | 0.99 | 0 | 1 | -0.8 | 0.42 | -0.8 | 1 |
| Blue Ting | 0 | 1 | -0.005 | 1 | 0.003 | 1 | 0 | 1 | 0.005 | 1 | -0.008 | 0.99 | 0.001 | 1 | -0.003 | 1 | -0.003 | 0.42 |
| Chunky peanut butter | 0 | 1 | 0 | 1 | 0 | 1 | 0 | 1 | 0.007 | 0.99 | -0.007 | 0.99 | 0 | 1 | -0.003 | 1 | -0.003 | 1 |
| Conch bar bay | 0 | 1 | -0.005 | 1 | 0 | 1 | 0 | 1 | 0.005 | 1 | -0.007 | 0.99 | 0.001 | 1 | -0.8 | 0.42 | -0.003 | 1 |
| Cruise boat bow | 0 | 1 | -0.005 | 1 | 0.003 | 1 | 0 | 1 | 0 | 1 | -0.007 | 0.99 | 0 | 1 | -0.003 | 1 | -0.8 | 0.42 |
| Cruise terminal red buoy | 0 | 1 | 0 | 1 | 0.003 | 1 | 0 | 1 | 0.005 | 1 | -0.007 | 0.99 | 0 | 1 | -0.003 | 1 | -0.003 | 1 |
| Dellis Cay Cut | 0 | 1 | -0.005 | 1 | 0.003 | 1 | 0.001 | 1 | 0.005 | 1 | -0.007 | 0.99 | 0 | 1 | 0.38 | 0.7 | 0.18 | 0.18 |
| Drum Point | 0 | 1 | -0.005 | 1 | 0 | 1 | 0 | 1 | 0.005 | 1 | -0.007 | 0.99 | 0 | 1 | -0.003 | 1 | -0.8 | 0.42 |
| DS 5/6 Soft coral plain | 0 | 1 | 0 | 1 | 0 | 1 | 0 | 1 | 0.007 | 0.99 | 0 | 1 | 0 | 1 | -0.003 | 1 | -0.003 | 1 |
| End cruise dock | 0 | 1 | -0.005 | 1 | 0 | 1 | 0 | 1 | 0.005 | 1 | -0.008 | 0.99 | 0.001 | 1 | -0.003 | 1 | -0.003 | 1 |
| Fantasea | 0 | 1 | -0.007 | 1 | 0 | 1 | 0 | 1 | 0.005 | 1 | -0.008 | 0.99 | 0 | 1 | -0.003 | 1 | -0.003 | 1 |
| Fan-tastic | 0 | 1 | -0.005 | 1 | 0 | 1 | 0 | 1 | 0.005 | 1 | -0.007 | 0.99 | 0 | 1 | -0.003 | 1 | -0.8 | 0.42 |
| Flamingo Cut | -0.001 | 1 | -0.005 | 1 | 0 | 1 | 0 | 1 | 0.005 | 1 | -0.007 | 0.99 | 0 | 1 | -0.003 | 1 | -0.8 | 0.42 |
| Flamingo Pond | 0 | 1 | -0.005 | 1 | 0.003 | 1 | 0 | 1 | 0.007 | 0.99 | 0 | 1 | 0.001 | 1 | -0.003 | 1 | -0.8 | 0.42 |
| Long Cay Foot | 0 | 1 | -0.005 | 1 | 0.003 | 1 | 0 | 1 | 0.007 | 0.99 | -0.007 | 0.99 | 0 | 1 | -0.003 | 1 | -0.8 | 0.42 |
| Long Cay, big cut | 0 | 1 | 0 | 1 | 0.003 | 1 | 0 | 1 | 0.007 | 0.99 | -0.007 | 0.99 | 0 | 1 | 0 | 1 | -0.003 | 1 |
| Mid Blue Hills | 0 | 1 | -0.005 | 1 | 0.003 | 1 | 0 | 1 | 0.007 | 0.99 | -0.007 | 0.99 | 0 | 1 | -0.003 | 1 | -0.003 | 1 |
| MPA Edge North | -0.001 | 1 | -0.005 | 1 | 0 | 1 | 0 | 1 | 0.004 | 1 | -0.008 | 0.99 | 0 | 1 | -0.98 | 0.33 | -1.71 | 0.09 |
| North Creek | 0 | 1 | -0.005 | 1 | 0.003 | 1 | 0 | 1 | 0.007 | 0.99 | 0 | 1 | 0.001 | 1 | -0.003 | 1 | -0.003 | 1 |
| North cruise dock | 0 | 1 | -0.005 | 1 | 0 | 1 | 0 | 1 | 0 | 1 | -0.01 | 0.99 | 0 | 1 | -0.003 | 1 | -0.003 | 1 |
| Only Fans | 0 | 1 | -0.005 | 1 | 0.003 | 1 | 0 | 1 | 0.005 | 1 | -0.008 | 0.99 | 0.001 | 1 | 1.01 | 0.31 | -0.76 | 0.45 |
| Outer banks cruise dock | 0 | 1 | -0.005 | 1 | 0 | 1 | 0 | 1 | 0 | 1 | -0.007 | 0.99 | 0 | 1 | -0.8 | 0.42 | -0.003 | 1 |
| Peanut butter crunch | 0 | 1 | 0 | 1 | 0 | 1 | 0.001 | 1 | 0.007 | 0.99 | -0.007 | 0.99 | 0 | 1 | -0.003 | 1 | 0 | 1 |
| Pine Cay Cut | -0.001 | 1 | -0.005 | 1 | 0.003 | 1 | 0 | 1 | 0.005 | 1 | -0.008 | 0.99 | 0 | 1 | -1.33 | 0.18 | 1.33 | 0.18 |
| Porites Mound | 0 | 1 | 0 | 1 | 0.003 | 1 | 0 | 1 | 0.005 | 1 | -0.007 | 0.99 | 0 | 1 | -0.8 | 0.42 | 0 | 1 |
| Rolly Patch extravaganza | -0.001 | 1 | -0.005 | 1 | 0.003 | 1 | 0 | 1 | 0.005 | 1 | -0.008 | 0.99 | 0 | 1 | -1.33 | 0.18 | 1.33 | 0.18 |
| Rubble Bay | 0 | 1 | -0.005 | 1 | 0 | 1 | 0 | 1 | 0 | 1 | -0.008 | 0.99 | 0 | 1 | 0 | 1 | 0.003 | 1 |
| Rubble Valleys | 0 | 1 | -0.005 | 1 | 0.003 | 1 | 0.001 | 1 | 0.005 | 1 | -0.007 | 0.99 | 0.001 | 1 | -1.71 | 0.09 | -1.33 | 0.18 |
| Sea Fan Plain | 0 | 1 | -0.005 | 1 | 0.003 | 1 | 0 | 1 | 0.005 | 1 | -0.007 | 0.99 | 0 | 1 | -0.47 | 0.64 | -1.4 | 0.16 |
| Shallow cruise terminal | 0 | 1 | -0.005 | 1 | 0 | 1 | 0 | 1 | 0 | 1 | -0.008 | 0.99 | 0 | 1 | -0.003 | 1 | -0.003 | 1 |
| Ship Wreck | 0 | 1 | 0 | 1 | 0.003 | 1 | 0 | 1 | 0.007 | 0.99 | -0.008 | 0.99 | 0.001 | 1 | -0.8 | 0.42 | -0.8 | 0.42 |
| The Hills | 0 | 1 | -0.005 | 1 | 0 | 1 | 0 | 1 | 0.005 | 1 | 0 | 1 | 0 | 1 | -0.003 | 1 | -0.003 | 1 |
| Thomson Cove | 0 | 1 | -0.005 | 1 | 0.003 | 1 | 0 | 1 | 0.005 | 1 | -0.007 | 0.99 | 0 | 1 | 0.56 | 0.58 | -0.47 | 0.64 |
| Water Cay | -0.001 | 1 | -0.005 | 1 | 0 | 1 | 0.001 | 1 | 0.005 | 1 | -0.008 | 0.99 | 0 | 1 | -1.33 | 0.18 | 0 | 1 |
| Wave Rock | 0 | 1 | 0 | 1 | 0 | 1 | 0 | 1 | 0.005 | 1 | -0.007 | 0.99 | 0 | 1 | -0.8 | 0.42 | -0.003 | 1 |
| Water depth (m) | | 0.95 | 0.34 | 0.66 | 0.51 | -1.14 | 0.25 | -0.57 | 0.57 | -0.33 | 0.74 | 0.05 | 0.96 | 0.21 | 0.84 | -2.61 | *0.009* | -0.37 | 0.71 |
| Quadrat volume (cm3) | | 3.175 | *0.002* | 0.14 | 0.89 | 0.33 | 0.75 | -0.97 | 0.33 | -0.75 | 0.45 | 1.28 | 0.2 | -0.54 | 0.59 | 1.2 | 0.23 | 1.95 | 0.05 |
| Rubble type | branching (B) | 3.98 | *7E-04* | 0 | 1 | -3.76 | 0.0002 | -0.007 | 0.99 | -1.29 | 0.2 | 1.6 | 0.11 | -3.56 | *4E-04* | -1.6 | 0.11 | -2.51 | 0.012 |
| massive (M) | -0.26 | 0.8 | 1.81 | 0.07 | 0.48 | 0.63 | 0.006 | 1 | 1.51 | 0.13 | 0.47 | 0.64 | 0.85 | 0.4 | -2.16 | *0.031* | -0.34 | 0.74 |
| mix | -0.15 | 0.88 | 0.38 | 0.7 | -0.44 | 0.66 | 0.006 | 1 | 0.51 | 0.61 | -0.74 | 0.46 | 0.7 | 0.49 | -0.31 | 0.76 | 0.67 | 0.51 |
| shell (S) | -0.005 | 0.99 | -0.017 | 0.99 | -0.006 | 1 | 0 | 1 | -0.02 | 0.99 | -0.02 | 0.99 | -0.002 | 1 | -0.02 | 0.99 | -0.007 | 0.99 |
| Shell & branching | -2.34 | *0.019* | -0.92 | 0.36 | -0.012 | 0.99 | 0 | 1 | -0.56 | 0.58 | -0.51 | 0.61 | -0.005 | 1 | -0.47 | 0.64 | -0.01 | 0.99 |
| Shell & massive | 0.009 | 0.99 | 1.4 | 0.16 | 0.05 | 0.96 | 0 | 1 | 1.78 | 0.075 | 0.17 | 0.87 | -0.006 | 1 | -0.93 | 0.35 | -0.62 | 0.54 |
| Rubble patch size (m2) | | -2.13 | *0.03* | -1.1 | 0.27 | -1.28 | 0.2 | -0.39 | 0.7 | -3.02 | *0.003* | -2.87 | *0.004* | -0.07 | 0.95 | 0.05 | 0.96 | -1.03 | 0.3 |
| Patch size category | S | -0.008 | 0.99 | 1.59 | 0.11 | 1.02 | 0.31 | -0.004 | 1 | 1.93 | 0.053 | -0.19 | 0.85 | 0.27 | 0.79 | -1.77 | 0.077 | -0.27 | 0.79 |
| M | -0.009 | 0.99 | -0.2 | 0.84 | 1.02 | 0.31 | -0.38 | 0.7 | -1.62 | 0.11 | -0.4 | 0.69 | 0.65 | 0.52 | -2 | *0.046* | 1.8 | 0.08 |
| L | 0.01 | 0.99 | -0.59 | 0.56 | -3.56 | *4E-04* | -3.66 | *3E-04* | -1.06 | 0.29 | 2.26 | *0.024* | -3.346 | *8E-04* | -1.25 | 0.21 | -2.87 | *0.004* |
| XL | -0.009 | 0.99 | -0.78 | 0.44 | -1.09 | 0.28 | -0.004 | 1 | -3.33 | 0.0009 | -2.16 | *0.031* | 0.41 | 0.68 | -0.62 | 0.54 | 0.11 | 0.91 |
| Percentage Rubble Branching | | 0.86 | 0.39 | 0.01 | 0.99 | -1.48 | 0.14 | -0.74 | 0.46 | -0.73 | 0.47 | 0.53 | 0.6 | -0.08 | 0.94 | 0.77 | 0.44 | 1.66 | 0.1 |
| Percentage Rubble Dredged | | 0.007 | 0.99 | -0.53 | 0.6 | -0.01 | 0.99 | -0.007 | 1 | -0.01 | 0.99 | -0.71 | 0.48 | -0.007 | 0.99 | -0.012 | 0.99 | -0.013 | 0.99 |
| Percentage Rubble Massive | | -0.14 | 0.89 | -0.47 | 0.64 | -0.11 | 0.9 | 0.32 | 0.75 | -0.4 | 0.7 | -0.12 | 0.91 | -0.66 | 0.51 | -2.5 | *0.013* | -0.71 | 0.48 |
| Percentage Rubble Other | | 2.46 | *0.014* | 1.25 | 0.21 | 1.75 | 0.08 | -0.21 | 0.83 | 2.17 | *0.03* | 0.54 | 0.59 | 1.57 | 0.11 | 0.21 | 0.84 | -0.49 | 0.63 |
| Percentage Rubble Rock | | -3.21 | *0.001* | -1.69 | 0.09 | -0.72 | 0.47 | 1.42 | 0.16 | 0.03 | 0.97 | -1.13 | 0.26 | -0.47 | 0.64 | -0.36 | 0.72 | -1.19 | 0.23 |
| Percentage Rubble Shell | | -3.44 | *6E-04* | -0.78 | 0.43 | 0.18 | 0.86 | 0.89 | 0.38 | -0.93 | 0.35 | -0.85 | 0.4 | -1.19 | 0.23 | 1.22 | 0.22 | -0.51 | 0.61 |
| Rubble Count | | -3.18 | *0.002* | 0.12 | 0.9 | -1.48 | 0.14 | 0.21 | 0.83 | 0.17 | 0.87 | -1.8 | 0.07 | 2.05 | *0.041* | -0.3 | 0.77 | -1.51 | 0.13 |
| Rubble Volume (cm3) | | 2.04 | *0.041* | 1.17 | 0.24 | 0.14 | 0.89 | 1.76 | 0.08 | 1.17 | 0.24 | -0.1 | 0.92 | 0.6 | 0.55 | -1.47 | 0.14 | 0.24 | 0.81 |
| Interstitial Space (cm3) | | 2.92 | *0.004* | -0.23 | 0.82 | 0.27 | 0.78 | -1.77 | 0.08 | -1.23 | 0.22 | 1.39 | 0.17 | -0.79 | 0.43 | 1.85 | 0.06 | 1.97 | *0.049* |
| Mean rubble fragment volume (cm3) | | 2.314 | *0.021* | 0.69 | 0.49 | 0.22 | 0.83 | 0.58 | 0.56 | -1.02 | 0.31 | -0.44 | 0.66 | -0.85 | 0.4 | -2.03 | 0.04 | -0.66 | 0.5 |
| Mean rubble fragment length (cm) | | 2.163 | *0.031* | 0.56 | 0.59 | 0.05 | 0.96 | 0.47 | 0.64 | -1.65 | 0.1 | 1.02 | 0.31 | -2.02 | *0.043* | 0.03 | 0.98 | 1.31 | 0.19 |
| Mean rubble fragment width (cm) | | 2.055 | 0.0399 | 0.26 | 0.8 | 0.65 | 0.51 | 0.84 | 0.4 | -1.38 | 0.17 | 0.15 | 0.88 | -1.94 | 0.053 | -1.43 | 0.15 | -0.07 | 0.94 |
| Mean branching rubble fragment volume (cm3) | | 1.393 | 0.164 | -0.54 | 0.59 | 0.8 | 0.42 | 0.49 | 0.63 | -1.74 | 0.08 | 1.51 | 0.12 | -1.74 | 0.08 | 1.88 | 0.06 | 1.5 | 0.13 |
| Mean dredged rubble fragment volume (cm3) | | 0 | 1 | 0.56 | 0.58 | 0 | 1 | 0 | 1 | 0 | 1 | -0.001 | 1 | 0 | 1 | 0 | 1 | 0 | 1 |
| Mean massive rubble fragment volume (cm3) | | 2.25 | 0.0245 | 1.33 | 0.18 | -0.003 | 1 | 1.59 | 0.11 | 1.85 | 0.06 | 0.13 | 0.9 | 0.42 | 0.68 | -0.68 | 0.5 | 0.4 | 0.69 |
| Mean other rubble fragment volume (cm3) | | 1.405 | 0.16 | 0.83 | 0.41 | 0.76 | 0.45 | 1.75 | 0.08 | -2.45 | *0.014* | -0.76 | 0.45 | -1.28 | 0.2 | 0.71 | 0.48 | 0.42 | 0.68 |
| Mean rock fragment volume (cm3) | | -1.32 | 0.1868 | 0.73 | 0.47 | -0.32 | 0.75 | -0.19 | 0.85 | -0.74 | 0.46 | 0.61 | 0.54 | -0.22 | 0.82 | 1.55 | 0.12 | -0.33 | 0.74 |
| Mean shell fragment volume (cm3) | | 0.413 | 0.68 | 1.49 | 0.14 | 2.12 | *0.034* | 0.57 | 0.57 | 0.61 | 0.54 | 0.08 | 0.93 | -2.35 | *0.019* | -1.11 | 0.27 | -0.7 | 0.49 |
| Mean branching rubble fragment length (cm) | | 2.079 | *0.038* | 0.09 | 0.93 | 0.98 | 0.33 | 0.08 | 0.94 | -1.75 | 0.08 | 1.78 | 0.07 | -2.38 | *0.018* | 2.01 | *0.044* | 1.68 | 0.09 |
| Mean dredged rubble fragment length (cm) | | 0 | 1 | 0.55 | 0.59 | 0 | 1 | 0 | 1 | 0 | 1 | -0.001 | 1 | 0 | 1 | 0 | 1 | 0 | 1 |
| Mean massive rubble fragment length (cm) | | 2.888 | *0.004* | 1.13 | 0.26 | 1.13 | 0.26 | 1.1 | 0.27 | 2.13 | *0.033* | 0.82 | 0.42 | 1.22 | 0.22 | 0.07 | 0.94 | -0.19 | 0.85 |
| Mean other rubble fragment length (cm) | | 1.444 | 0.149 | 0.74 | 0.46 | 1.3 | 0.19 | 1.7 | 0.09 | -2.3 | *0.022* | -0.4 | 0.7 | -1.53 | 0.13 | 1.29 | 0.2 | 0.68 | 0.5 |
| Mean rock fragment length (cm) | | -1.351 | 0.1766 | 1.11 | 0.27 | -0.374 | 0.71 | 0.27 | 0.79 | -0.72 | 0.47 | -0.05 | 0.96 | -0.05 | 0.96 | 1.67 | 0.1 | -0.49 | 0.62 |
| Mean shell fragment length (cm) | | 0.165 | 0.8689 | 0.47 | 0.64 | 0.16 | 0.87 | -0.55 | 0.58 | -1.25 | 0.21 | -1.48 | 0.14 | -2.65 | *0.008* | -1.44 | 0.15 | -0.12 | 0.9 |
| Mean branching rubble fragment width (cm) | | 1.851 | 0.0642 | -0.68 | 0.5 | 1.79 | 0.07 | 1.33 | 0.18 | -1.5 | 0.13 | 1.22 | 0.22 | -2 | *0.046* | 1.25 | 0.21 | 2.66 | *0.008* |
| Mean dredged rubble fragment width (cm) | | 0 | 1 | 0.16 | 0.88 | 0 | 1 | 0 | 1 | 0 | 1 | -0.005 | 1 | 0 | 1 | 0 | 1 | 0 | 1 |
| Mean massive rubble fragment width (cm) | | 3.14 | *0.002* | 1.28 | 0.2 | 1.03 | 0.3 | 1.12 | 0.26 | 1.71 | 0.09 | 1.11 | 0.27 | 0.68 | 0.5 | 0.59 | 0.55 | 0.29 | 0.78 |
| Mean other rubble fragment width (cm) | | 1.402 | 0.161 | -0.32 | 0.75 | 1.3 | 0.2 | 1.47 | 0.14 | -2.52 | *0.012* | -0.54 | 0.59 | -1.76 | 0.08 | 0.67 | 0.5 | 0.6 | 0.55 |
| Mean rock fragment width (cm) | | -1.856 | 0.0635 | 0.45 | 0.65 | -0.03 | 0.98 | 0.86 | 0.39 | -1.06 | 0.29 | -1.06 | 0.29 | -0.026 | 0.98 | 1.87 | 0.062 | -0.89 | 0.37 |
| Mean shell fragment width (cm) | | 0.654 | 0.5133 | 0.99 | 0.32 | 0.1 | 0.92 | -0.53 | 0.6 | -1.27 | 0.2 | -1.33 | 0.18 | -2.476 | *0.013* | -0.94 | 0.35 | -0.11 | 0.92 |
| Percentage of available space within rubble matrix (cm3) | | 0.615 | 0.539 | -0.73 | 0.47 | -0.44 | 0.66 | -2.49 | *0.014* | -1.89 | 0.06 | 0.16 | 0.87 | -0.7 | 0.49 | 1.45 | 0.15 | 0.88 | 0.38 |
| Adjacent habitat | coral | 0.006 | 1 | 3.04 | *0.002* | -3.04 | 0.002 | -3.61 | *3E-04* | 0.73 | 0.47 | 2.13 | *0.033* | -3.61 | *3E-04* | -1.09 | 0.28 | -0.37 | 0.72 |
| coral & rock | 0 | 1 | 0.64 | 0.16 | -0.08 | 0.93 | -0.67 | 0.5 | -0.64 | 0.53 | 0.11 | 0.91 | -0.005 | 1 | -1.2 | 0.23 | -0.95 | 0.34 |
| rock | -0.005 | 1 | 0.52 | 0.069 | -0.68 | 0.49 | -0.006 | 1 | -0.15 | 0.88 | -0.6 | 0.55 | 0.34 | 0.73 | -1.85 | 0.06 | -2.45 | *0.014* |
| rubble | 0 | 1 | 1.24 | *0.045* | -0.008 | 1 | -0.001 | 1 | -1.13 | 0.26 | -0.02 | 0.99 | -0.002 | 1 | -0.01 | 0.99 | -0.014 | 0.99 |
| sand | -0.006 | 1 | 0.64 | *6E-04* | 0.52 | 0.6 | -0.003 | 1 | -1.26 | 0.21 | -1.32 | 0.19 | -0.005 | 1 | -2.06 | *0.039* | -1.51 | 0.13 |
| sand & rock | 0 | 1 | 0.02 | 0.99 | -0.01 | 0.99 | -0.002 | 1 | -1.02 | 0.31 | -0.93 | 0.35 | -0.002 | 1 | -0.31 | 0.76 | -1.28 | 0.2 |
| sand, rock & seagrass | 0 | 1 | -0.007 | 0.99 | -0.004 | 1 | -0.001 | 1 | -0.02 | 0.99 | 0.007 | 0.99 | -0.001 | 1 | -0.007 | 0.99 | -0.007 | 0.99 |
| seagrass | -0.006 | 1 | -1.76 | 0.08 | -0.009 | 0.99 | -0.001 | 1 | -1.41 | 0.16 | 0.45 | 0.65 | -0.002 | 1 | 1.52 | 0.13 | -1.07 | 0.29 |
| Adjacent distance to coral (m) | | -2.98 | *0.003* | 0.15 | 0.88 | -0.69 | 0.49 | -0.32 | 0.75 | -1.6 | 0.11 | -0.72 | 0.47 | -0.99 | 0.32 | 1.48 | 0.14 | -2.31 | 0.02 |
| Adjacent distance to reef (m) | | -0.92 | 0.36 | 0.6 | 0.55 | -1.38 | 0.17 | 0.95 | 0.34 | -0.95 | 0.34 | -0.72 | 0.47 | -1.58 | 0.11 | 1.39 | 0.17 | -0.84 | 0.4 |
| Adjacent distance to rock (m) | | -2.76 | *0.006* | -1.26 | 0.21 | -1.15 | 0.25 | 0.47 | 0.64 | -1.05 | 0.29 | 0.19 | 0.85 | -0.41 | 0.68 | 0.94 | 0.35 | -1.66 | 0.1 |
| Adjacent distance to sand (m) | | 1.14 | 0.25 | 1.46 | 0.15 | -0.25 | 0.81 | 0 | 1 | 1.3 | 0.19 | 1.28 | 0.2 | 0.55 | 0.58 | 1.47 | 0.14 | 0.28 | 0.78 |
| Adjacent distance to seagrass (m) | | -0.22 | 0.83 | -1.21 | 0.23 | 0 | 1 | 0 | 1 | -0.8 | 0.42 | -0.23 | 0.82 | -0.69 | 0.5 | -0.55 | 0.58 | 1.94 | 0.052 |

Table S4: Total count and mean count per quadrat of each phylum per rubble patch size. Patch size categories are S (≤ 1 m2), M (≤ 1 m2), L (< 100 m2), XL (≥ 100 m2).

| Patch size | Phyla | Total count of specimens | Mean count of specimens per 0.09 m2 quadrat |
| --- | --- | --- | --- |
| L | Annelida | 403 | 13 |
| M | Annelida | 630 | 14 |
| S | Annelida | 600 | 13.33333 |
| XL | Annelida | 254 | 6.684211 |
| L | Arthropoda | 44 | 1.419355 |
| M | Arthropoda | 67 | 1.488889 |
| S | Arthropoda | 75 | 1.666667 |
| XL | Arthropoda | 58 | 1.526316 |
| L | Chordata | 4 | 0.129032 |
| M | Chordata | 15 | 0.333333 |
| S | Chordata | 13 | 0.288889 |
| XL | Chordata | 2 | 0.052632 |
| L | Cnidaria | 4 | 0.129032 |
| M | Cnidaria | 2 | 0.044444 |
| S | Cnidaria | 0 | 0 |
| XL | Cnidaria | 0 | 0 |
| L | Echinodermata | 62 | 2 |
| M | Echinodermata | 58 | 1.288889 |
| S | Echinodermata | 65 | 1.444444 |
| XL | Echinodermata | 28 | 0.736842 |
| L | Mollusca | 51 | 1.645161 |
| M | Mollusca | 53 | 1.177778 |
| S | Mollusca | 96 | 2.133333 |
| XL | Mollusca | 30 | 0.789474 |
| L | Nemertea | 1 | 0.032258 |
| M | Nemertea | 5 | 0.111111 |
| S | Nemertea | 2 | 0.044444 |
| XL | Nemertea | 2 | 0.052632 |
| L | Other | 26 | 0.83871 |
| M | Other | 16 | 0.355556 |
| S | Other | 17 | 0.377778 |
| XL | Other | 20 | 0.526316 |
| L | Porifera | 9 | 0.290323 |
| M | Porifera | 24 | 0.533333 |
| S | Porifera | 13 | 0.288889 |
| XL | Porifera | 20 | 0.526316 |

Table S5: Total count and mean count per quadrat of each phylum per adjacent habitat

| Adjacent Habitat | Phyla | Total count of specimens | Mean count of specimens per 0.09 m2 quadrat |
| --- | --- | --- | --- |
| coral | Annelida | 480 | 16 |
| coral | Arthropoda | 62 | 2.066667 |
| coral | Chordata | 6 | 0.2 |
| coral | Cnidaria | 5 | 0.166667 |
| coral | Echinodermata | 60 | 2 |
| coral | Mollusca | 47 | 1.566667 |
| coral | Nemertea | 2 | 0.066667 |
| coral | Other | 23 | 0.766667 |
| coral | Porifera | 26 | 0.866667 |
| coral/rock | Annelida | 298 | 14.19048 |
| coral/rock | Arthropoda | 30 | 1.428571 |
| coral/rock | Chordata | 5 | 0.238095 |
| coral/rock | Cnidaria | 1 | 0.047619 |
| coral/rock | Echinodermata | 33 | 1.571429 |
| coral/rock | Mollusca | 31 | 1.47619 |
| coral/rock | Nemertea | 0 | 0 |
| coral/rock | Other | 7 | 0.333333 |
| coral/rock | Porifera | 9 | 0.428571 |
| rock | Annelida | 885 | 12.82609 |
| rock | Arthropoda | 104 | 1.507246 |
| rock | Chordata | 17 | 0.246377 |
| rock | Cnidaria | 0 | 0 |
| rock | Echinodermata | 95 | 1.376812 |
| rock | Mollusca | 102 | 1.478261 |
| rock | Nemertea | 8 | 0.115942 |
| rock | Other | 33 | 0.478261 |
| rock | Porifera | 21 | 0.304348 |
| rubble | Annelida | 14 | 3.5 |
| rubble | Arthropoda | 1 | 0.25 |
| rubble | Chordata | 0 | 0 |
| rubble | Cnidaria | 0 | 0 |
| rubble | Echinodermata | 3 | 0.75 |
| rubble | Mollusca | 0 | 0 |
| rubble | Nemertea | 0 | 0 |
| rubble | Other | 0 | 0 |
| rubble | Porifera | 0 | 0 |
| sand | Annelida | 92 | 4 |
| sand | Arthropoda | 16 | 0.695652 |
| sand | Chordata | 6 | 0.26087 |
| sand | Cnidaria | 0 | 0 |
| sand | Echinodermata | 14 | 0.608696 |
| sand | Mollusca | 29 | 1.26087 |
| sand | Nemertea | 0 | 0 |
| sand | Other | 3 | 0.130435 |
| sand | Porifera | 6 | 0.26087 |
| sand/rock | Annelida | 93 | 15.5 |
| sand/rock | Arthropoda | 28 | 4.666667 |
| sand/rock | Chordata | 0 | 0 |
| sand/rock | Cnidaria | 0 | 0 |
| sand/rock | Echinodermata | 6 | 1 |
| sand/rock | Mollusca | 7 | 1.166667 |
| sand/rock | Nemertea | 0 | 0 |
| sand/rock | Other | 2 | 0.333333 |
| sand/rock | Porifera | 1 | 0.166667 |
| sand/rock/seagrass | Annelida | 13 | 13 |
| sand/rock/seagrass | Arthropoda | 0 | 0 |
| sand/rock/seagrass | Chordata | 0 | 0 |
| sand/rock/seagrass | Cnidaria | 0 | 0 |
| sand/rock/seagrass | Echinodermata | 0 | 0 |
| sand/rock/seagrass | Mollusca | 9 | 9 |
| sand/rock/seagrass | Nemertea | 0 | 0 |
| sand/rock/seagrass | Other | 0 | 0 |
| sand/rock/seagrass | Porifera | 0 | 0 |
| seagrass | Annelida | 12 | 2.4 |
| seagrass | Arthropoda | 3 | 0.6 |
| seagrass | Chordata | 0 | 0 |
| seagrass | Cnidaria | 0 | 0 |
| seagrass | Echinodermata | 2 | 0.4 |
| seagrass | Mollusca | 5 | 1 |
| seagrass | Nemertea | 0 | 0 |
| seagrass | Other | 11 | 2.2 |
| seagrass | Porifera | 3 | 0.6 |

Table S6: Results of phyla abundance when compared to adjacent habitat using two-way ANOVA and Tukey posthoc test. Adjacent habitats are categorised as the closest habitat to the sampled quadrat. When multiple habitats were equidistant from the sampled area, they were combined (e.g. coral/rock, sand/rock, and sand/rock/seagrass) Significant values shown in red italics.

| **Phyla** | **Adjacent habitat comparison** | **t ratio** | **p value** |
| --- | --- | --- | --- |
| Annelid | Coral – coral/rock | 1.612 | 0.743 |
| Coral – rock | 3.678 | *0.0059* |
| Coral - rubble | 5.95 | *< 0.0001* |
| Coral – sand | 10.97 | *< 0.0001* |
| Coral – sand/rock | 0.28 | 1 |
| Coral – sand/rock/seagrass | 0.75 | 1 |
| Coral – seagrass | 7.13 | *< 0.0001* |
| Coral/rock – rock | 1.39 | 0.86 |
| Coral/rock – rubble | 4.97 | *< 0.0001* |
| Coral/rock – sand | 8.56 | *< 0.0001* |
| Coral/rock – sand/rock | -0.72 | 1 |
| Coral/rock – sand/rock/seagrass | 0.30 | 1 |
| Coral/rock - seagrass | 6.01 | *< 0.0001* |
| Rock – rubble | 4.60 | *0.0001* |
| Rock – sand | 9.29 | *< 0.0001* |
| Rock – sand/rock | -1.59 | 0.76 |
| Rock – sand/rock/seagrass | -0.04 | 1 |
| Rock – seagrass | 5.71 | *< 0.0001* |
| Rubble – sand | -0.23 | 1 |
| Rubble – sand/rock | -4.71 | *0.0001* |
| Rubble – sand/rock/seagrass | -2.15 | 0.38 |
| Rubble - seagrass | 0.42 | 0.381 |
| Sand – sand/rock | -6.36 | *< 0.0001* |
| Sand – sand/rock/seagrass | -2.23 | 0.33 |
| Sand – seagrass | 0.82 | 0.99 |
| Sand/rock – sand/rock/seagrass | 0.59 | 1 |
| Sand/rock - seagrass | 5.48 | *< 0.0001* |
| Sand/rock/seagrass - seagrass | 2.45 | 0.22 |
| Arthropoda | Coral – coral/rock | 0.57 | 1 |
| Coral – rock | 0.65 | 1 |
| Coral - rubble | 0.87 | 0.99 |
| Coral – sand | 1.25 | 0.92 |
| Coral – sand/rock | -1.47 | 0.82 |
| Coral – sand/rock/seagrass | 0.52 | 1 |
| Coral – seagrass | 0.77 | 0.99 |
| Coral/rock – rock | -0.08 | 1 |
| Coral/rock – rubble | 0.55 | 1 |
| Coral/rock – sand | 0.62 | 1 |
| Coral/rock – sand/rock | -1.77 | 0.64 |
| Coral/rock – sand/rock/seagrass | 0.35 | 1 |
| Coral/rock - seagrass | 0.42 | 1 |
| Rock – rubble | 0.62 | 1 |
| Rock – sand | 0.85 | 0.99 |
| Rock – sand/rock | -1.88 | 0.56 |
| Rock – sand/rock/seagrass | 0.38 | 1 |
| Rock – seagrass | 0.50 | 1 |
| Rubble – sand | -0.21 | 1 |
| Rubble – sand/rock | -1.73 | 0.66 |
| Rubble – sand/rock/seagrass | 0.06 | 1 |
| Rubble - seagrass | -0.13 | 1 |
| Sand – sand/rock | -2.20 | 0.36 |
| Sand – sand/rock/seagrass | 0.17 | 1 |
| Sand – seagrass | 0.05 | 1 |
| Sandrock – sand/rock/seagrass | 1.10 | 0.96 |
| Sandrock - seagrass | 1.70 | 0.69 |
| Sand/rock/seagrass - seagrass | -0.14 | 1 |
| Chordata | Coral – coral/rock | -0.03 | 1 |
| Coral – rock | -0.05 | 1 |
| Coral - rubble | 0.10 | 1 |
| Coral – sand | -0.06 | 1 |
| Coral – sand/rock | 0.11 | 1 |
| Coral – sand/rock/seagrass | 0.05 | 1 |
| Coral – seagrass | 0.11 | 1 |
| Coral/rock – rock | -0.01 | 1 |
| Coral/rock – rubble | 0.11 | 1 |
| Coral/rock – sand | -0.02 | 1 |
| Coral/rock – sand/rock | 0.13 | 1 |
| Coral/rock – sand/rock/seagrass | 0.06 | 1 |
| Coral/rock - seagrass | 0.12 | 1 |
| Rock – rubble | 0.12 | 1 |
| Rock – sand | -0.02 | 1 |
| Rock – sand/rock | 0.15 | 1 |
| Rock – sand/rock/seagrass | 0.06 | 1 |
| Rock – seagrass | 0.14 | 1 |
| Rubble – sand | -0.12 | 1 |
| Rubble – sand/rock | 0 | 1 |
| Rubble – sand/rock/seagrass | 0 | 1 |
| Rubble - seagrass | 0 | 1 |
| Sand – sand/rock | 0.14 | 1 |
| Sand – sand/rock/seagrass | 0.07 | 1 |
| Sand – seagrass | 0.13 | 1 |
| Sand/rock – sand/rock/seagrass | 0 | 1 |
| Sand/rock - seagrass | 0 | 1 |
| Sand/rock/seagrass - seagrass | 0 | 1 |
| Cnidaria | Coral – coral/rock | 0.11 | 1 |
| Coral – rock | 0.19 | 1 |
| Coral - rubble | 0.08 | 1 |
| Coral – sand | 0.15 | 1 |
| Coral – sand/rock | 0.09 | 1 |
| Coral – sand/rock/seagrass | 0.04 | 1 |
| Coral – seagrass | 0.09 | 1 |
| Coral/rock – rock | 0.05 | 1 |
| Coral/rock – rubble | 0.02 | 1 |
| Coral/rock – sand | 0.04 | 1 |
| Coral/rock – sand/rock | 0.03 | 1 |
| Coral/rock – sand/rock/seagrass | 0.01 | 1 |
| Coral/rock - seagrass | 0.02 | 1 |
| Rock – rubble | 0 | 1 |
| Rock – sand | 0 | 1 |
| Rock – sand/rock | 0 | 1 |
| Rock – sand/rock/seagrass | 0 | 1 |
| Rock – seagrass | 0 | 1 |
| Rubble – sand | 0 | 1 |
| Rubble – sand/rock | 0 | 1 |
| Rubble – sand/rock/seagrass | 0 | 1 |
| Rubble - seagrass | 0 | 1 |
| Sand – sand/rock | 0 | 1 |
| Sand – sand/rock/seagrass | 0 | 1 |
| Sand – seagrass | 0 | 1 |
| Sand/rock – sand/rock/seagrass | 0 | 1 |
| Sand/rock - seagrass | 0 | 1 |
| Sand/rock/seagrass - seagrass | 0 | 1 |
| Echinodermata | Coral – coral/rock | 0.38 | 1 |
| Coral – rock | 0.72 | 1 |
| Coral - rubble | 0.60 | 1 |
| Coral – sand | 1.27 | 0.91 |
| Coral – sand/rock | 0.57 | 1 |
| Coral – sand/rock/seagrass | 0.50 | 1 |
| Coral – seagrass | 0.84 | 1 |
| Coral/rock – rock | 0.20 | 1 |
| Coral/rock – rubble | 0.38 | 1 |
| Coral/rock – sand | 0.81 | 0.99 |
| Coral/rock – sand/rock | 0.31 | 1 |
| Coral/rock – sand/rock/seagrass | 0.39 | 1 |
| Coral/rock - seagrass | 0.60 | 1 |
| Rock – rubble | 0.31 | 1 |
| Rock – sand | 0.81 | 0.99 |
| Rock – sand/rock | 0.22 | 1 |
| Rock – sand/rock/seagrass | 0.35 | 1 |
| Rock – seagrass | 0.54 | 1 |
| Rubble – sand | 0.07 | 1 |
| Rubble – sand/rock | -0.10 | 1 |
| Rubble – sand/rock/seagrass | 0.17 | 1 |
| Rubble - seagrass | 0.13 | 1 |
| Sand – sand/rock | -0.22 | 1 |
| Sand – sand/rock/seagrass | 0.15 | 1 |
| Sand – seagrass | 0.11 | 1 |
| Sand/rock – sand/rock/seagrass | 0.24 | 1 |
| Sand/rock - seagrass | 0.25 | 1 |
| Sand/rock/seagrass - seagrass | -0.09 | 1 |
| Mollusca | Coral – coral/rock | 0.08 | 1 |
| Coral – rock | 0.10 | 1 |
| Coral - rubble | 0.75 | 1 |
| Coral – sand | 0.28 | 1 |
| Coral – sand/rock | 0.23 | 1 |
| Coral – sand/rock/seagrass | -1.85 | 0.58 |
| Coral – seagrass | 0.30 | 1 |
| Coral/rock – rock | -0.002 | 1 |
| Coral/rock – rubble | 0.69 | 1 |
| Coral/rock – sand | 0.18 | 1 |
| Coral/rock – sand/rock | 0.17 | 1 |
| Coral/rock – sand/rock/seagrass | -1.86 | 0.58 |
| Coral/rock - seagrass | 0.24 | 1 |
| Rock – rubble | 0.73 | 1 |
| Rock – sand | 0.23 | 1 |
| Rock – sand/rock | 0.19 | 1 |
| Rock – sand/rock/seagrass | -1.89 | 0.56 |
| Rock – seagrass | 0.26 | 1 |
| Rubble – sand | -0.59 | 1 |
| Rubble – sand/rock | -0.46 | 1 |
| Rubble – sand/rock/seagrass | -2.04 | 0.45 |
| Rubble - seagrass | -0.38 | 1 |
| Sand – sand/rock | 0.05 | 1 |
| Sand – sand/rock/seagrass | -1.92 | 0.54 |
| Sand – seagrass | 0.13 | 1 |
| Sand/rock – sand/rock/seagrass | -1.84 | 0.59 |
| Sand/rock - seagrass | 0.07 | 1 |
| Sand/rock/seagrass - seagrass | 1.85 | 0.59 |
| Nemertea | Coral – coral/rock | 0.06 | 1 |
| Coral – rock | -0.06 | 1 |
| Coral - rubble | 0.03 | 1 |
| Coral – sand | 0.06 | 1 |
| Coral – sand/rock | 0.04 | 1 |
| Coral – sand/rock/seagrass | 0.02 | 1 |
| Coral – seagrass | 0.04 | 1 |
| Coral/rock – rock | -0.12 | 1 |
| Coral/rock – rubble | 0 | 1 |
| Coral/rock – sand | 0 | 1 |
| Coral/rock – sand/rock | 0 | 1 |
| Coral/rock – sand/rock/seagrass | 0 | 1 |
| Coral/rock - seagrass | 0 | 1 |
| Rock – rubble | 0.06 | 1 |
| Rock – sand | 0.12 | 1 |
| Rock – sand/rock | 0.07 | 1 |
| Rock – sand/rock/seagrass | 0.03 | 1 |
| Rock – seagrass | 0.06 | 1 |
| Rubble – sand | 0 | 1 |
| Rubble – sand/rock | 0 | 1 |
| Rubble – sand/rock/seagrass | 0 | 1 |
| Rubble - seagrass | 0 | 1 |
| Sand – sand/rock | 0 | 1 |
| Sand – sand/rock/seagrass | 0 | 1 |
| Sand – seagrass | 0 | 1 |
| Sand/rock – sand/rock/seagrass | 0 | 1 |
| Sand/rock - seagrass | 0 | 1 |
| Sand/rock/seagrass - seagrass | 0 | 1 |
| Porifera | Coral – coral/rock | 0.39 | 1 |
| Coral – rock | 0.65 | 1 |
| Coral - rubble | 0.41 | 1 |
| Coral – sand | 0.55 | 1 |
| Coral – sand/rock | 0.40 | 1 |
| Coral – sand/rock/seagrass | 0.22 | 1 |
| Coral – seagrass | 0.14 | 1 |
| Coral/rock – rock | 0.13 | 1 |
| Coral/rock – rubble | 0.20 | 1 |
| Coral/rock – sand | 0.14 | 1 |
| Coral/rock – sand/rock | 0.14 | 1 |
| Coral/rock – sand/rock/seagrass | 0.11 | 1 |
| Coral/rock - seagrass | -0.09 | 1 |
| Rock – rubble | 0.15 | 1 |
| Rock – sand | 0.05 | 1 |
| Rock – sand/rock | 0.08 | 1 |
| Rock – sand/rock/seagrass | 0.08 | 1 |
| Rock – seagrass | -0.16 | 1 |
| Rubble – sand | -0.12 | 1 |
| Rubble – sand/rock | -0.07 | 1 |
| Rubble – sand/rock/seagrass | 0 | 1 |
| Rubble - seagrass | -0.23 | 1 |
| Sand – sand/rock | 0.05 | 1 |
| Sand – sand/rock/seagrass | 0.07 | 1 |
| Sand – seagrass | -0.17 | 1 |
| Sand/rock – sand/rock/seagrass | 0.04 | 1 |
| Sand/rock - seagrass | -0.18 | 1 |
| Sand/rock/seagrass - seagrass | -0.14 | 1 |
| Other | Coral – coral/rock | 0.39 | 1 |
| Coral – rock | 0.33 | 1 |
| Coral - rubble | 0.37 | 1 |
| Coral – sand | 0.58 | 1 |
| Coral – sand/rock | 0.25 | 1 |
| Coral – sand/rock/seagrass | 0.19 | 1 |
| Coral – seagrass | -0.75 | 1 |
| Coral/rock – rock | -0.15 | 1 |
| Coral/rock – rubble | 0.16 | 1 |
| Coral/rock – sand | 0.17 | 1 |
| Coral/rock – sand/rock | 0 | 1 |
| Coral/rock – sand/rock/seagrass | 0.08 | 1 |
| Coral/rock - seagrass | -0.95 | 0.98 |
| Rock – rubble | 0.24 | 1 |
| Rock – sand | 0.37 | 1 |
| Rock – sand/rock | 0.09 | 1 |
| Rock – sand/rock/seagrass | 0.12 | 1 |
| Rock – seagrass | -0.94 | 0.98 |
| Rubble – sand | -0.06 | 1 |
| Rubble – sand/rock | -0.13 | 1 |
| Rubble – sand/rock/seagrass | 0 | 1 |
| Rubble - seagrass | -0.83 | 0.99 |
| Sand – sand/rock | -0.11 | 1 |
| Sand – sand/rock/seagrass | 0.03 | 1 |
| Sand – seagrass | -1.06 | 0.96 |
| Sand/rock – sand/rock/seagrass | 0.08 | 1 |
| Sand/rock - seagrass | -0.78 | 0.99 |
| Sand/rock/seagrass - seagrass | -0.51 | 1 |

Table S7: Results of phyla abundance when compared to patch size using two-way ANOVA and Tukey posthoc test. Patch size categories are S (≤ 1 m2), M (≤ 1 m2), L (< 100 m2), XL (≥ 100 m2). Significant values shown in red italics.

| **Phyla** | **Rubble patch size compared** | **t ratio** | **p value** |
| --- | --- | --- | --- |
| Annelida | S – M | 0.78 | 0.86 |
| S – L | -0.35 | 0.98 |
| S – XL | 7.46 | *< 0.001* |
| M – L | -1.06 | 0.72 |
| M – XL | 8.20 | *< 0.001* |
| L – XL | 6.45 | *< 0.001* |
| Arthropoda | S – M | -0.21 | 1 |
| S – L | -0.26 | 0.99 |
| S – XL | 0.16 | 1 |
| M – L | -0.74 | 1 |
| M – XL | -0.04 | 1 |
| L – XL | -0.11 | 1 |
| Chordata | S – M | 0.05 | 1 |
| S – L | 0.17 | 1 |
| S – XL | 0.27 | 0.99 |
| M – L | -0.22 | 1 |
| M – XL | 0.32 | 0.99 |
| L – XL | -0.17 | 1 |
| Cnidaria | S – M | 0.05 | 1 |
| S – L | 0.14 | 1 |
| S – XL | 0 | 1 |
| M – L | 0.09 | 1 |
| M – XL | 0.05 | 1 |
| L – XL | 0.13 | 1 |
| Echinodermata | S – M | -0.18 | 1 |
| S – L | 0.59 | 0.94 |
| S – XL | 0.79 | 0.86 |
| M – L | 0.75 | 0.88 |
| M – XL | 0.62 | 0.93 |
| L – XL | 1.29 | 0.57 |
| Mollusca | S – M | -1.12 | 0.68 |
| S – L | -0.52 | 0.96 |
| S – XL | 1.51 | 0.43 |
| M – L | 0.50 | 0.96 |
| M – XL | 0.44 | 0.97 |
| L – XL | 0.87 | 0.82 |
| Nemertea | S – M | 0.08 | 1 |
| S – L | -0.01 | 1 |
| S – XL | -0.009 | 1 |
| M – L | -0.08 | 1 |
| M – XL | 0.07 | 1 |
| L – XL | -0.02 | 1 |
| Other | S – M | -0.03 | 1 |
| S – L | 0.49 | 0.96 |
| S – XL | -0.17 | 1 |
| M – L | 0.51 | 0.96 |
| M – XL | -0.19 | 1 |
| L – XL | 0.32 | 0.99 |
| Porifera | S – M | 0.29 | 0.99 |
| S – L | 0.002 | 1 |
| S – XL | -0.27 | 0.99 |
| M – L | -0.26 | 0.99 |
| M – XL | 0.008 | 1 |
| L – XL | -0.24 | 1 |
